# Supplementary material
Source: publisher figshare collection journal article supplement (https://gsajournals.figshare.com/articles/dataset/_/17207063)
Supplement: Supplementary file 2 [file 1]

## List of Supplemental Files

File S1. Supplemental\_file\_list.pdf - List of supplemental files

File S2. Supplemental\_materials.pdf - File S1; Figures S1-S2; Tables S1-S3

File S3. Phenotypes\_of\_growth.csv – Contains individual IDs and growth traits for Large White pigs

File S4. Phenotypes\_of\_reproductive.csv – Contains individual IDs and reproductive traits for Large White pigs

File S5. ped.csv – Contains individual IDs and pedigree for Large White pigs

File S6. pigs.ped.gz – Gzipped genotype data for genomic inbreeding coefficients

File S7. pigs.map – Maker locations for genomic inbreeding coefficients
